# Supplementary material for: Comparative analysis of full-length transcriptomes based on hybrid population reveals regulatory mechanisms of anthocyanin biosynthesis in sweet potato (Ipomoea batatas (L.) Lam)
Source: PubMed Central journal article supplement (PMC7325064; doi:10.1186/s12870-020-02513-1), 2020-06-29
Supplement: 12870_2020_2513_MOESM3_ESM.pdf [file 12870_2020_2513_MOESM3_ESM.pdf]

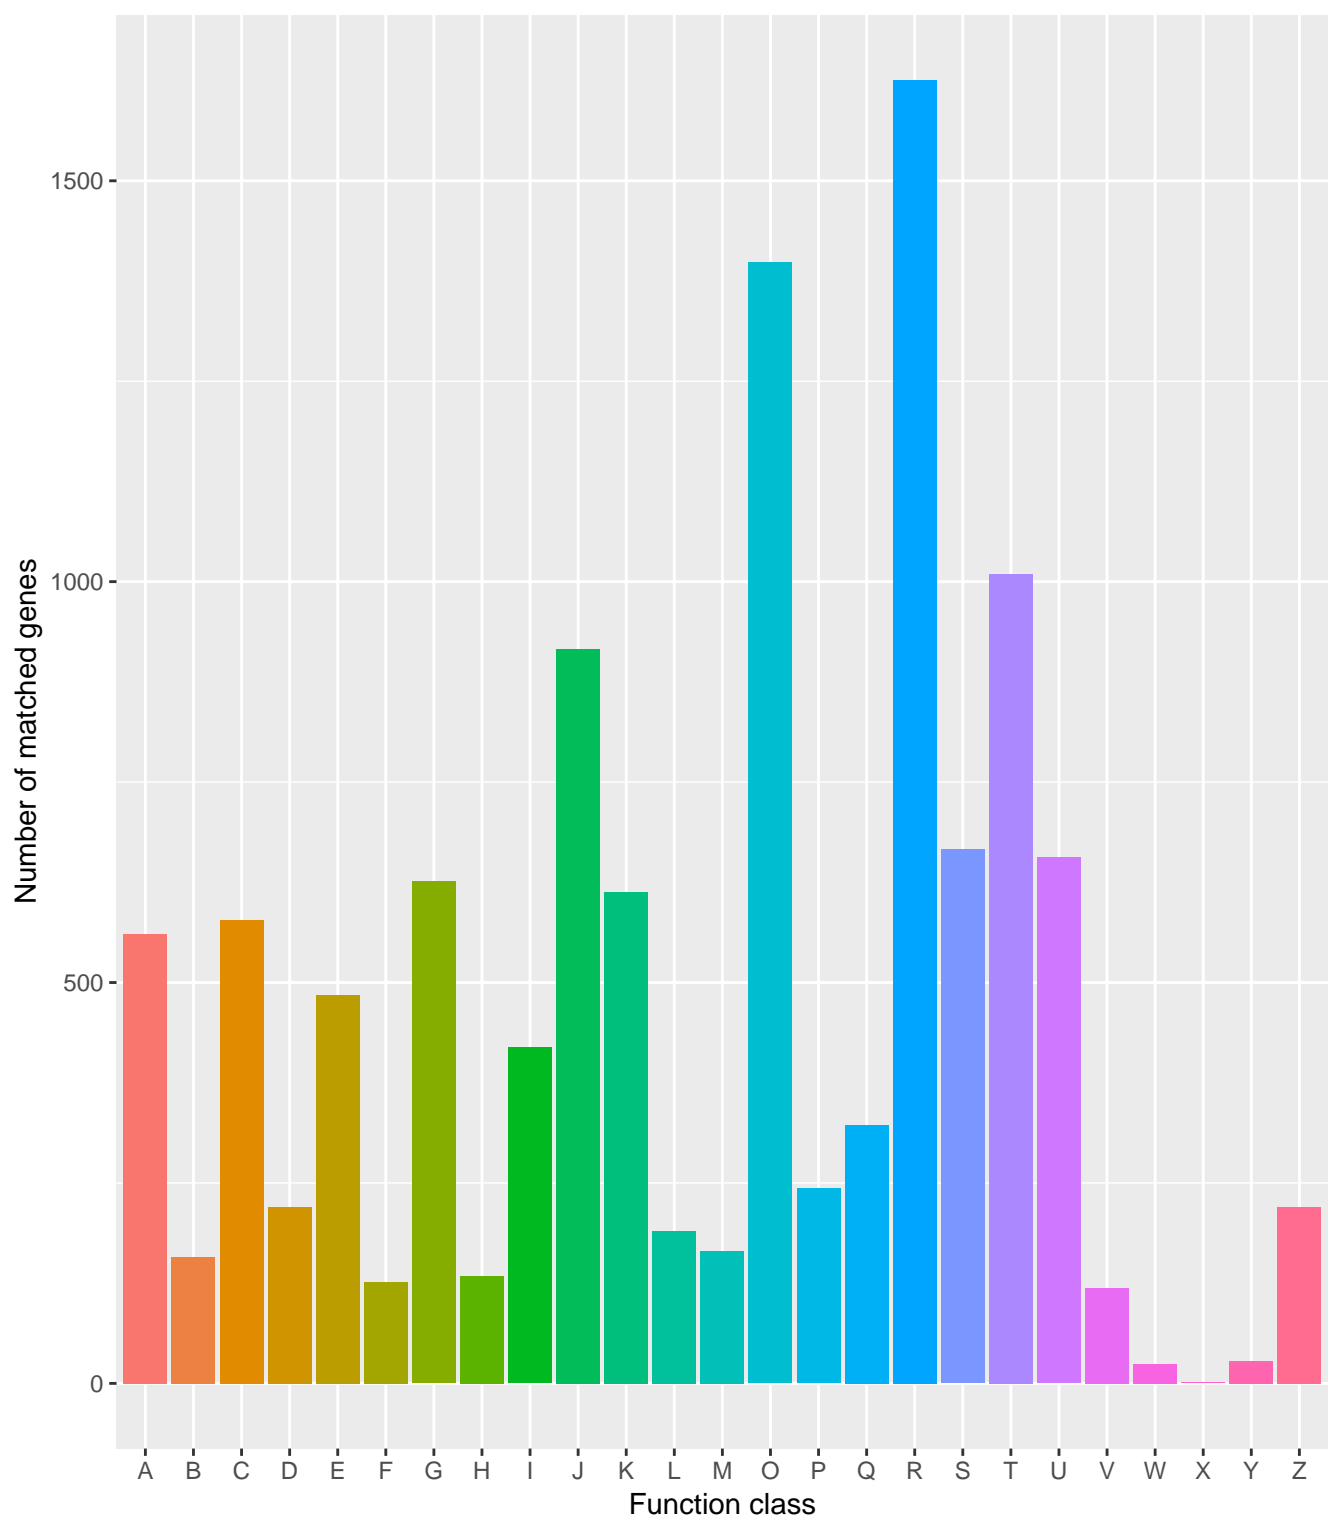

- A : RNA processing and modification
- B : Chromatin structure and dynamics
- C : Energy production and conversion
- D : Cell cycle control, cell division, chromosome partitioning
- E : Amino acid transport and metabolism
- F : Nucleotide transport and metabolism
- G : Carbohydrate transport and metabolism
- H : Coenzyme transport and metabolism
- I : Lipid transport and metabolism
- J : Translation, ribosomal structure and biogenesis
- K : Transcription
- L : Replication, recombination and repair
- M : Cell wall/membrane/envelope biogenesis
- O : Posttranslational modification, protein turnover, chaperones
- P : Inorganic ion transport and metabolism
- Q : Secondary metabolites biosynthesis, transport and catabolism
- R : General function prediction only
- S : Function unknown
- T : Signal transduction mechanisms
- U : Intracellular trafficking, secretion, and vesicular transport
- V : Defense mechanisms
- W : Extracellular structures
- X : Unnamed protein
- Y : Nuclear structure
- Z : Cytoskeleton
