# Supplementary material for: Comparative analysis of full-length transcriptomes based on hybrid population reveals regulatory mechanisms of anthocyanin biosynthesis in sweet potato (Ipomoea batatas (L.) Lam)
Source: PubMed Central journal article supplement (PMC7325064; doi:10.1186/s12870-020-02513-1), 2020-06-29

# KEGG pathway annotation

## Cellular Processes

Transport and catabolism  
 Cellular community - prokaryotes  
 Cellular community - eukaryotes  
 Cell motility  
 Cell growth and death

## Environmental Information Processing

Signal transduction  
 Membrane transport

## Genetic Information Processing

Translation  
 Transcription  
 Replication and repair  
 Folding, sorting and degradation

## Human Diseases

Substance dependence  
 Neurodegenerative diseases  
 Infectious diseases: Viral  
 Infectious diseases: Parasitic  
 Infectious diseases: Bacterial  
 Immune diseases  
 Endocrine and metabolic diseases  
 Drug resistance: Antineoplastic  
 Drug resistance: Antimicrobial  
 Cardiovascular diseases  
 Cancers: Specific types  
 Cancers: Overview

## Metabolism

Xenobiotics biodegradation and metabolism  
 Nucleotide metabolism  
 Metabolism of terpenoids and polyketides  
 Metabolism of other amino acids  
 Metabolism of cofactors and vitamins  
 Lipid metabolism  
 Glycan biosynthesis and metabolism  
 Global and overview maps  
 Energy metabolism  
 Carbohydrate metabolism  
 Biosynthesis of other secondary metabolites  
 Amino acid metabolism

## Organismal Systems

Sensory system  
 Nervous system  
 Immune system  
 Excretory system  
 Environmental adaptation  
 Endocrine system  
 Digestive system  
 Development  
 Circulatory system  
 Aging

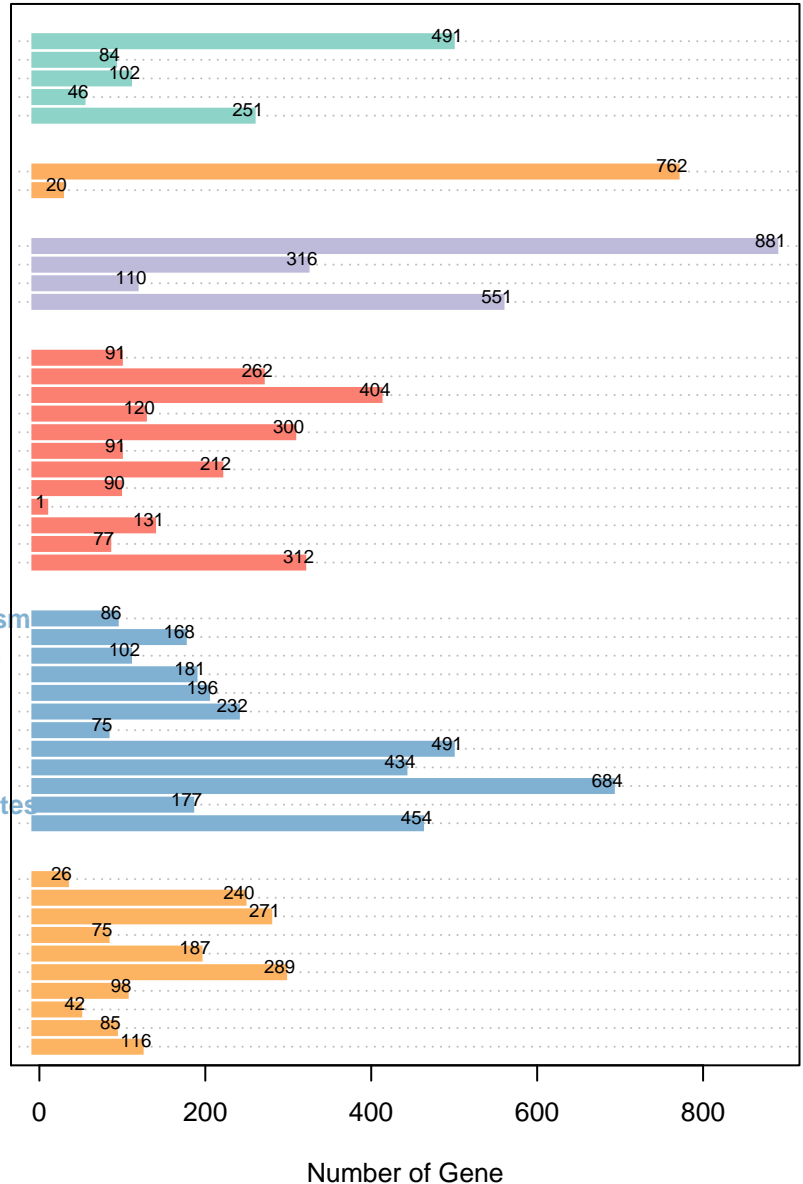

Supplement: 12870_2020_2513_MOESM4_ESM.pdf [file 12870_2020_2513_MOESM4_ESM.pdf]
