# Supplementary material for: Comparative analysis of full-length transcriptomes based on hybrid population reveals regulatory mechanisms of anthocyanin biosynthesis in sweet potato (Ipomoea batatas (L.) Lam)
Source: PubMed Central journal article supplement (PMC7325064; doi:10.1186/s12870-020-02513-1), 2020-06-29

## Differentially expressed transcription factor (Anth VS CK)

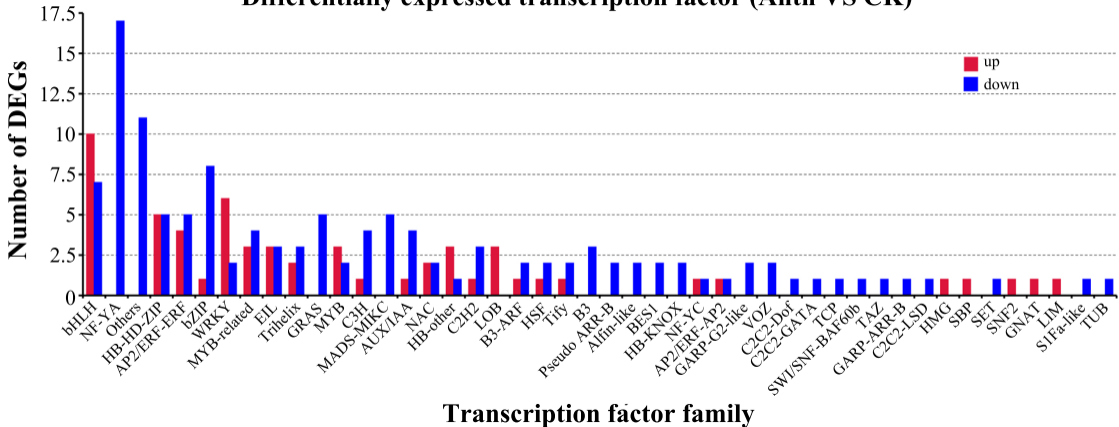

Supplement: 12870_2020_2513_MOESM10_ESM.pdf [file 12870_2020_2513_MOESM10_ESM.pdf]
